# Supplementary material
Source: Springer Nature journal article supplement (https://www.springermedizin.de/resource/supplementary/12881_2008_451_MOESM1_ESM.pdf/9450680)

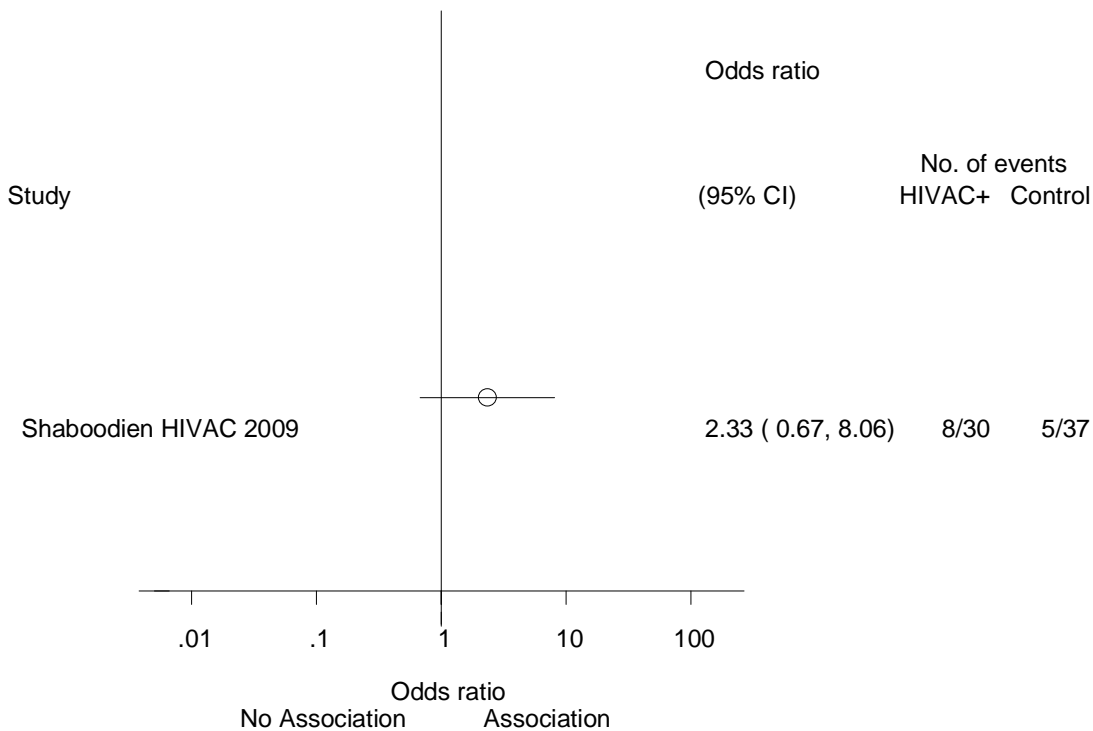

*HIVAC, HIV-associated cardiomyopathy; Horizontal lines, 95% credible interval*

Supplement: MOESM1 [file 9450680]
